# Supplementary material
Source: PubMed Central journal article supplement (PMC10615846)
Supplement: NIHMS1933518-supplement-7.pdf [file NIHMS1933518-supplement-7.pdf]

**Table S1. Phosphorylation of LAZY4 proteins in plants or in *in vitro* kinase assays, related to Figures 5 and 6**

| Peptides                                     | Up-regulated upon gravistimulation | Phosphorylation sites | IP-MS |    |    |    | in vitro kinase assay (MPK3) |     |     |     | Included in |       |         |
|----------------------------------------------|------------------------------------|-----------------------|-------|----|----|----|------------------------------|-----|-----|-----|-------------|-------|---------|
|                                              |                                    |                       | R1    | R2 | R3 | R4 | KR1                          | KR2 | KR3 | KR4 | A5/D5       | A9/D9 | A13/D13 |
| QEITHRPSISSASSHPR                            | √                                  | T18                   |       | *  | √  | √  | √                            | √   | √   | √   | √           | √     | √       |
|                                              |                                    | S22                   |       | *  | √  | √  | √                            | √   | √   | √   | √           | √     | √       |
|                                              |                                    | S24                   |       | *  | √  | √  | √                            | √   | √   | √   | √           | √     | √       |
|                                              |                                    | S25                   |       | *  | √  | √  | √                            | √   | √   | √   | √           | √     | √       |
|                                              |                                    | S27                   |       | *  | √  | *  | √                            | √   | √   | √   | √           | √     | √       |
| EEFNDWPHGLLAIGTFGNK/<br>EEFNDWPHGLLAIGTFGNKK |                                    | T47                   |       |    |    |    | √                            | √   | √   | √   |             |       | √       |
| KQTPQTLDOEVIQETVSNLHV<br>EGR                 |                                    | T54                   |       |    |    |    | √                            | √   | √   | √   |             |       | √       |
| FLNCPSSLEVDR/<br>FLNCPSSLEVDRR               | √                                  | S139                  | √     | √  | √  | √  | √                            | √   | √   | √   |             |       | √       |
|                                              |                                    | S140                  | √     | √  | √  | √  | √                            | √   | √   | √   |             |       | √       |
| ISNALCDEKEEDIER/<br>RISNALCDEKEEDIER         |                                    | S148                  | √     | √  | √  | √  | √                            | √   |     | √   |             |       | √       |
| TISVILGR                                     |                                    | S164                  | √     | √  | √  | √  |                              | √   | √   | √   |             |       | √       |
| MFVCTEGFSPVPRPILR                            |                                    | S208                  |       |    |    |    |                              | √   | √   | √   | √           |       | √       |
| QQLSLKNEEEGR                                 | √                                  | S258                  |       | *  | *  | √  | √                            |     | √   | √   | √           |       | √       |

This table summarizes the mass spectrometry results of the IP-MS experiment shown in Figures 5A and 5B (four replicates: R1 to R4), and *in vitro* kinase assays shown in Figure 5E (four replicates: KR1 to KR4). The phosphorylation sites with explicit MS/MS spectra are labeled “√”, and possible phosphorylation sites are labeled “\*”. In R1 to R4, MS1 area intensities of phosphorylated peptides were normalized by the total area intensity of phosphorylated and non-phosphorylated peptides. If max normalized MS1 intensity of a phosphorylated peptide in samples of gravistimulation was 5-fold greater than the control under vertical condition in at least two experimental replicates, the phosphorylation of the peptide is recorded as “up-regulated upon gravistimulation”. For LAZY4-A5/D5, A9/D9, and A13/D13 mutagenesis, selected amino acids were mutated to Ala (A) or Asp (D): A5/D5, the 5 phosphorylated amino acids identified in a phosphorylated peptide in domain I; A9/D9, the 9 total phosphorylated amino acids identified in domain I and III; A13/D13, all the 13 phosphorylated amino acids identified in plants and in *in vitro* kinase assays.
