# Supplementary material
Source: PubMed Central journal article supplement (PMC10615846)

**A**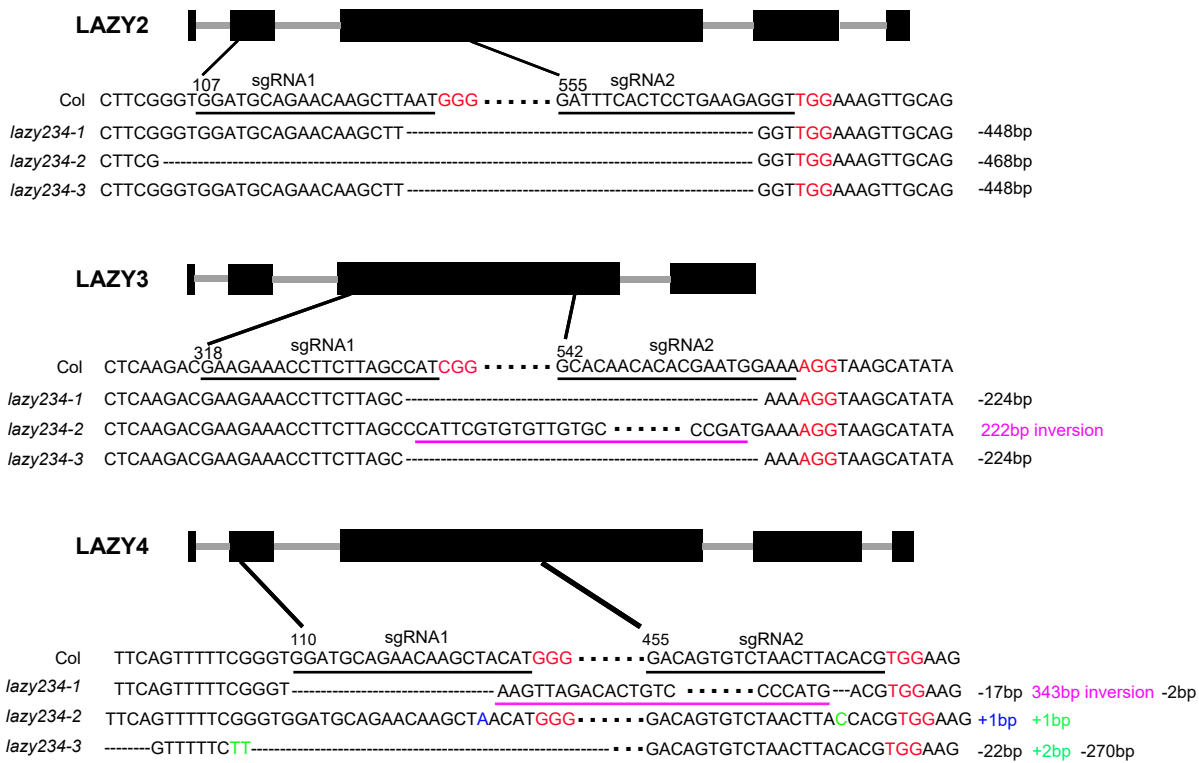**B**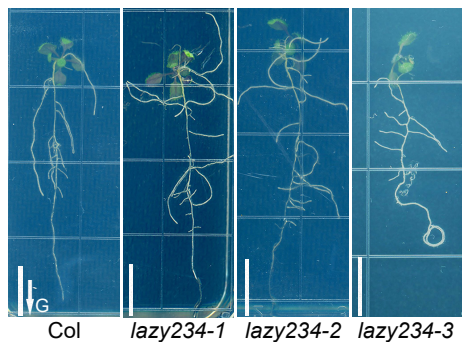**C**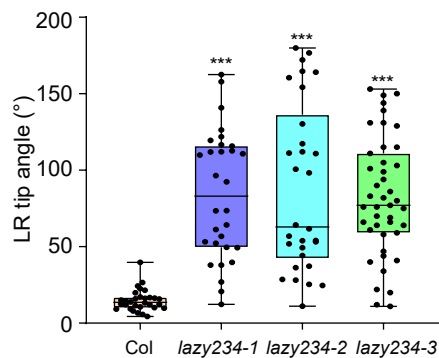**D**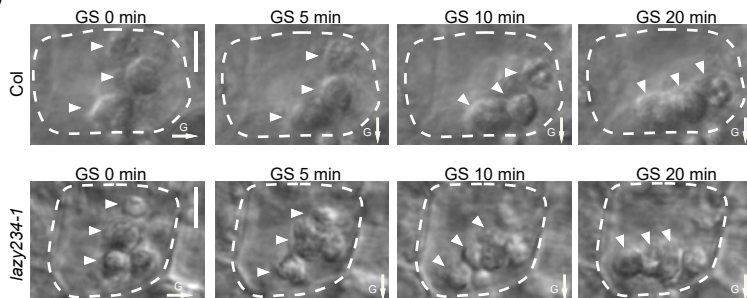**E**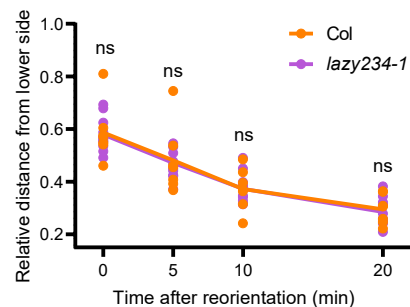

Supplement: NIHMS1933518-supplement-1.pdf [file NIHMS1933518-supplement-1.pdf]

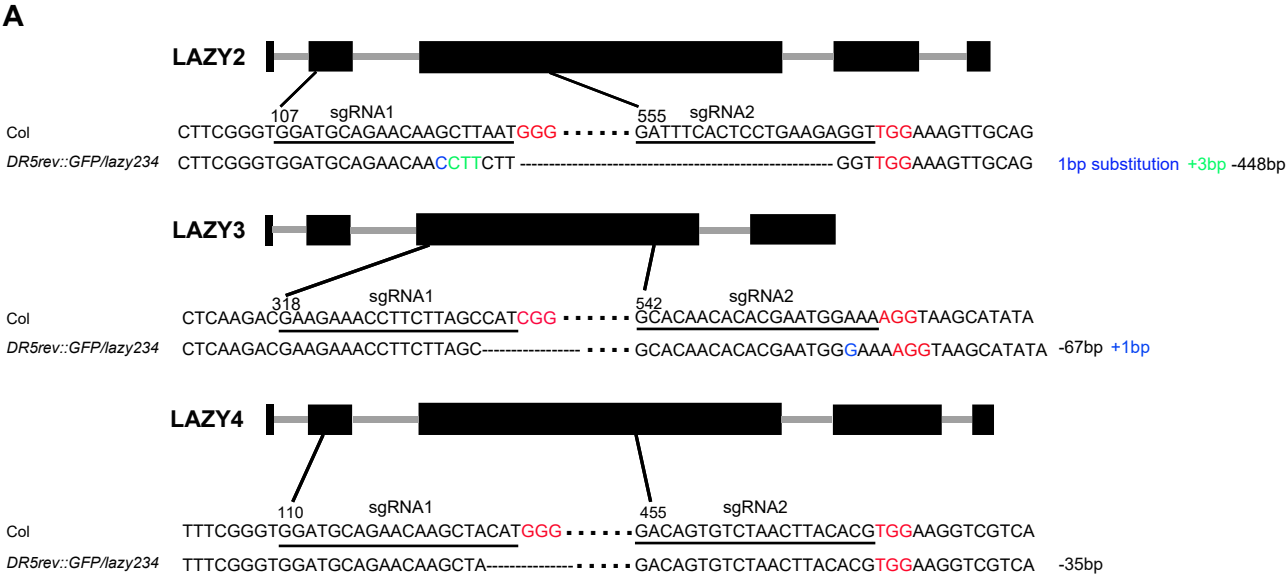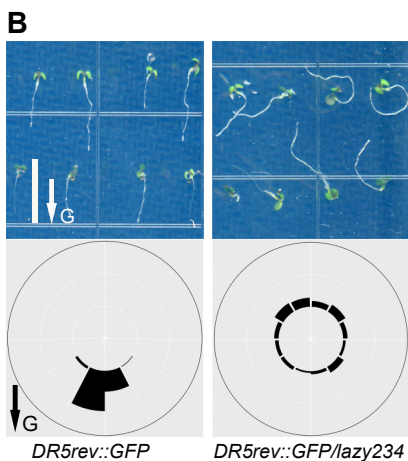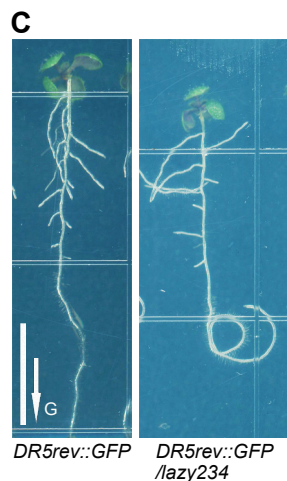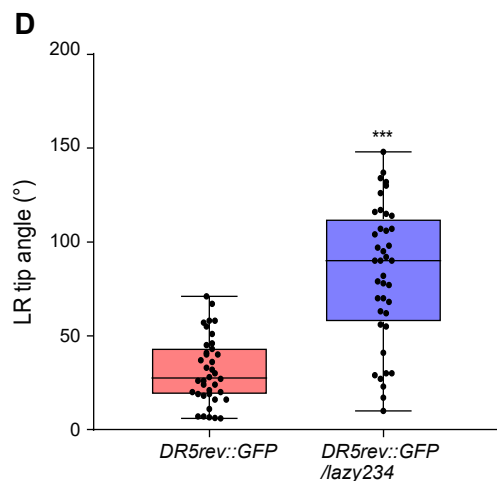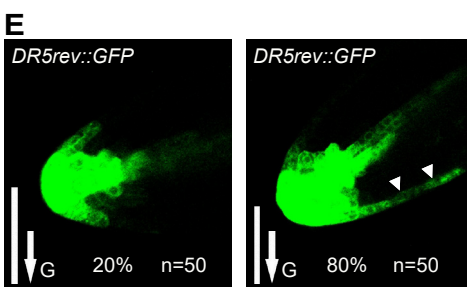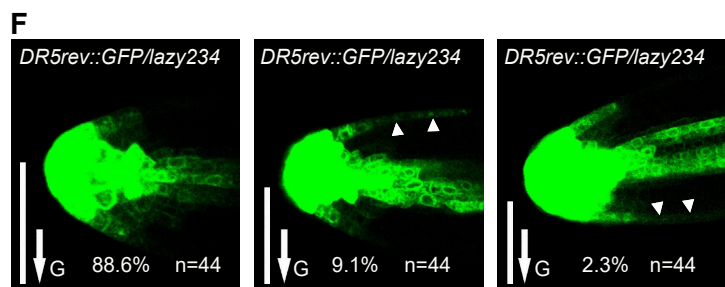

Supplement: NIHMS1933518-supplement-2.pdf [file NIHMS1933518-supplement-2.pdf]

**A**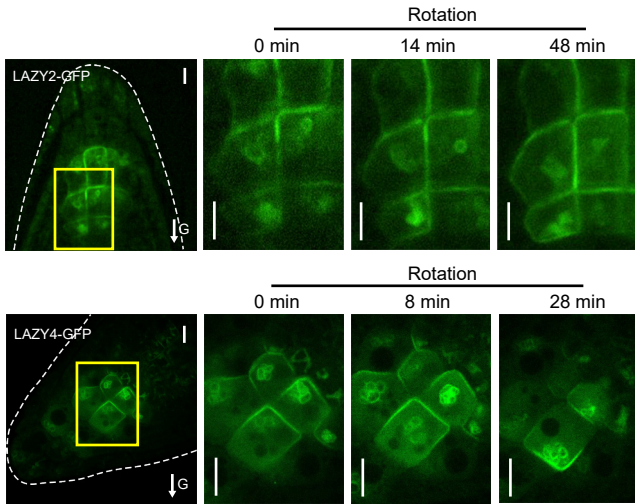**B**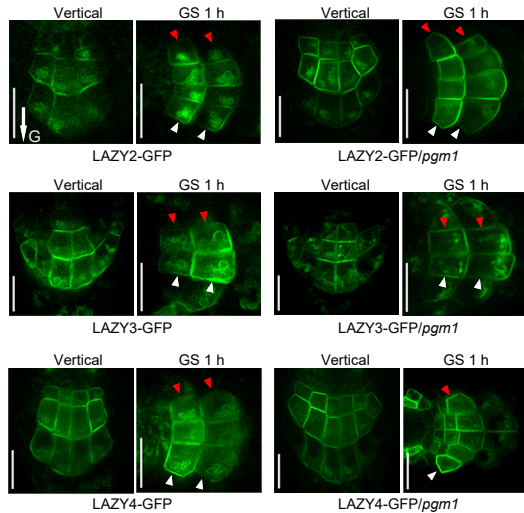

Supplement: NIHMS1933518-supplement-4.pdf [file NIHMS1933518-supplement-4.pdf]

**A**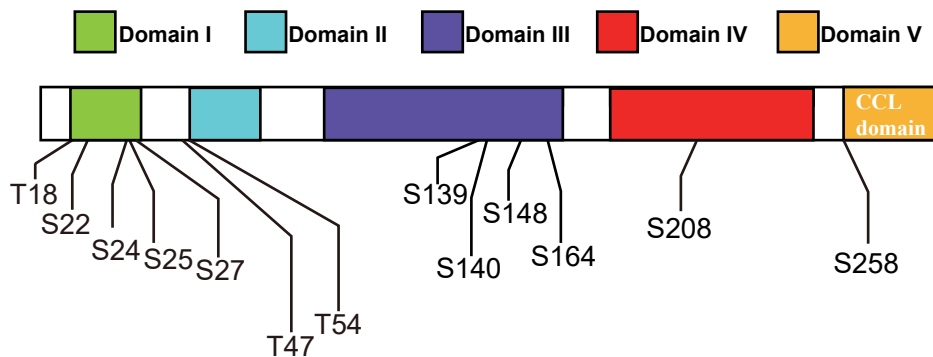**B**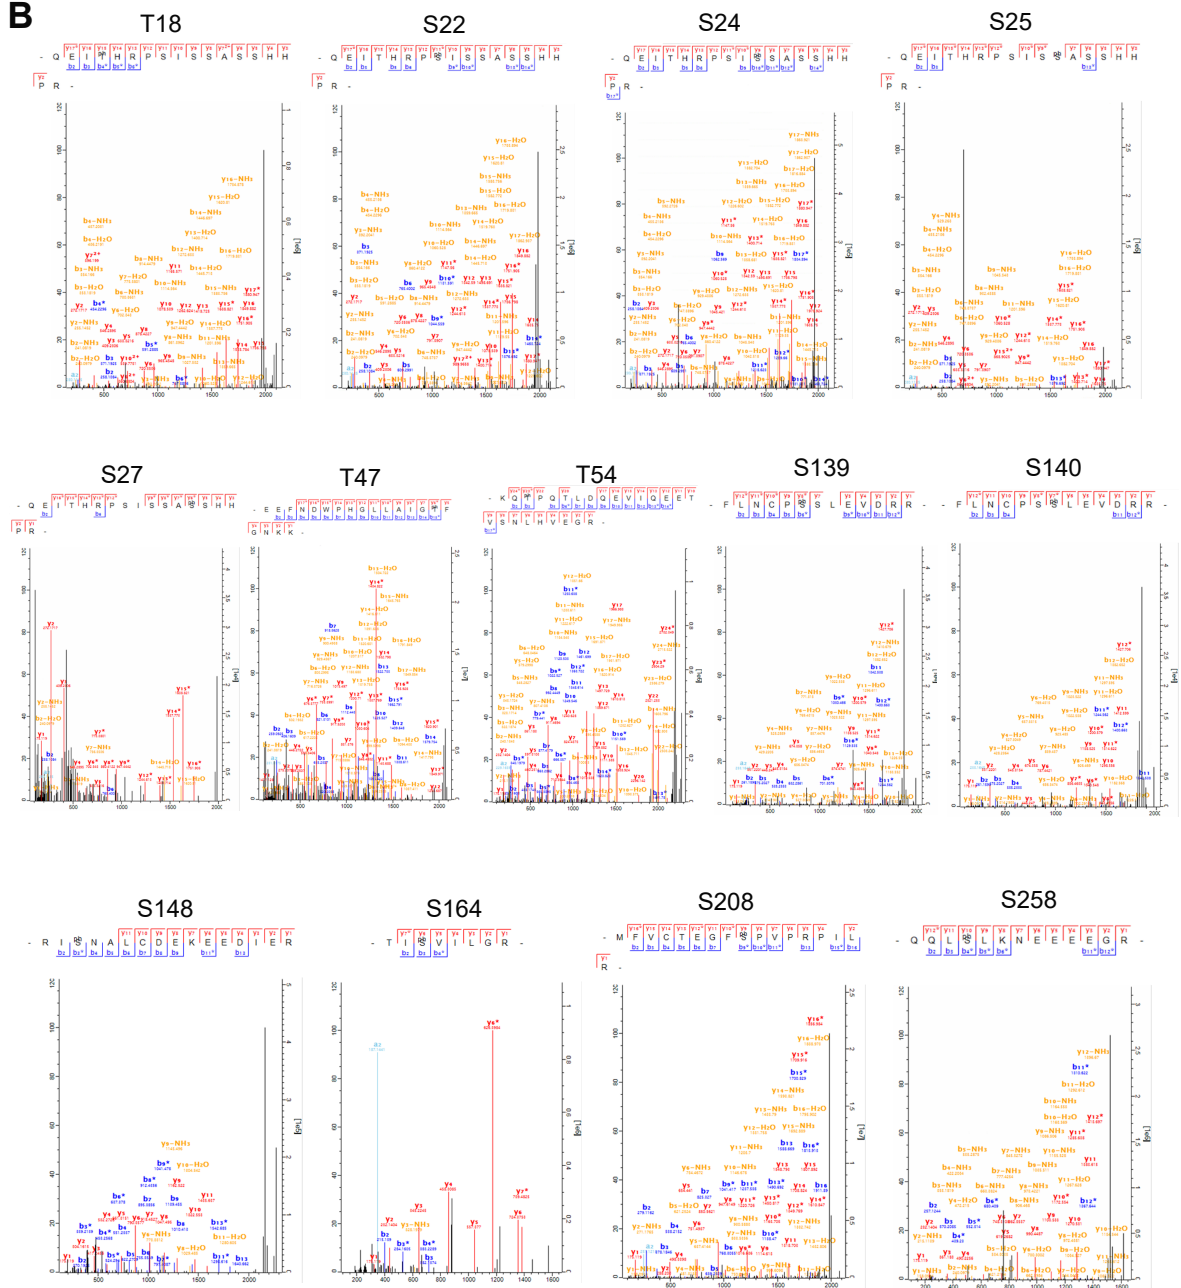

Supplement: NIHMS1933518-supplement-5.pdf [file NIHMS1933518-supplement-5.pdf]

**A**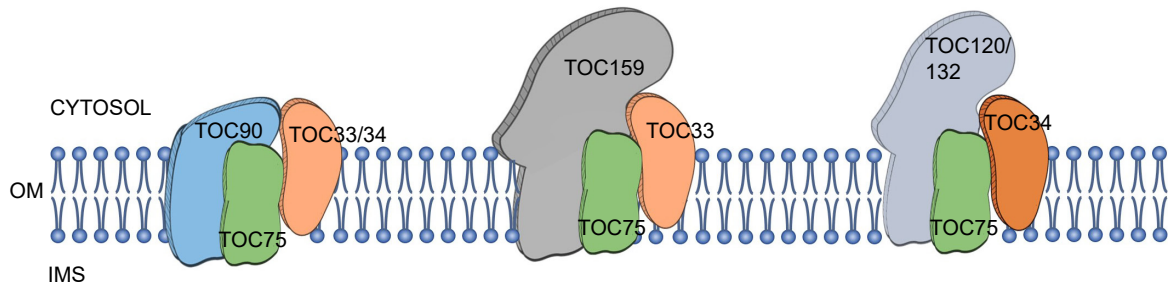**B**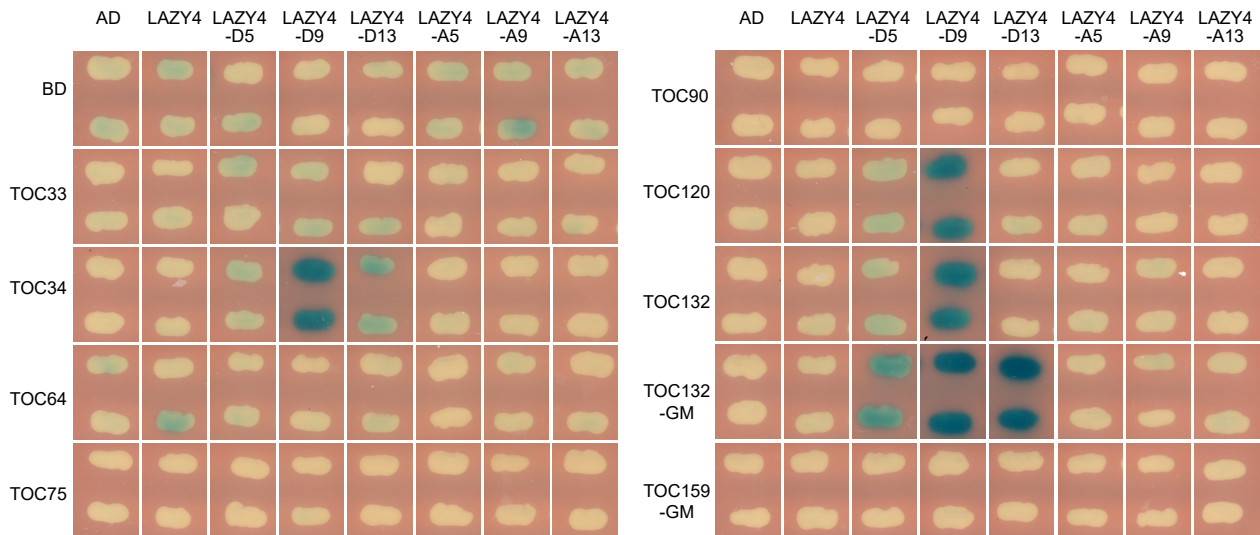**C****TOC120**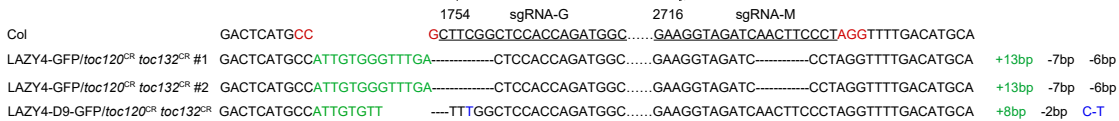**TOC132**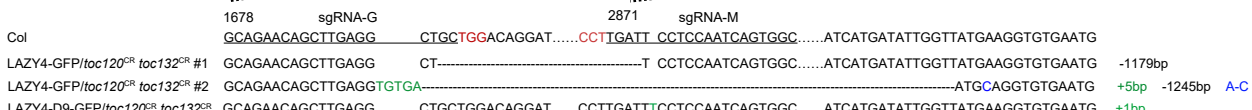

Supplement: NIHMS1933518-supplement-6.pdf [file NIHMS1933518-supplement-6.pdf]
